# Supplementary material
Source: Springer Nature journal article supplement (https://www.springermedizin.de/resource/supplementary/13063_2012_1015_MOESM4_ESM.pdf/9619694)

**Figure 3 Flow diagram of Observational study & assessment schedule**

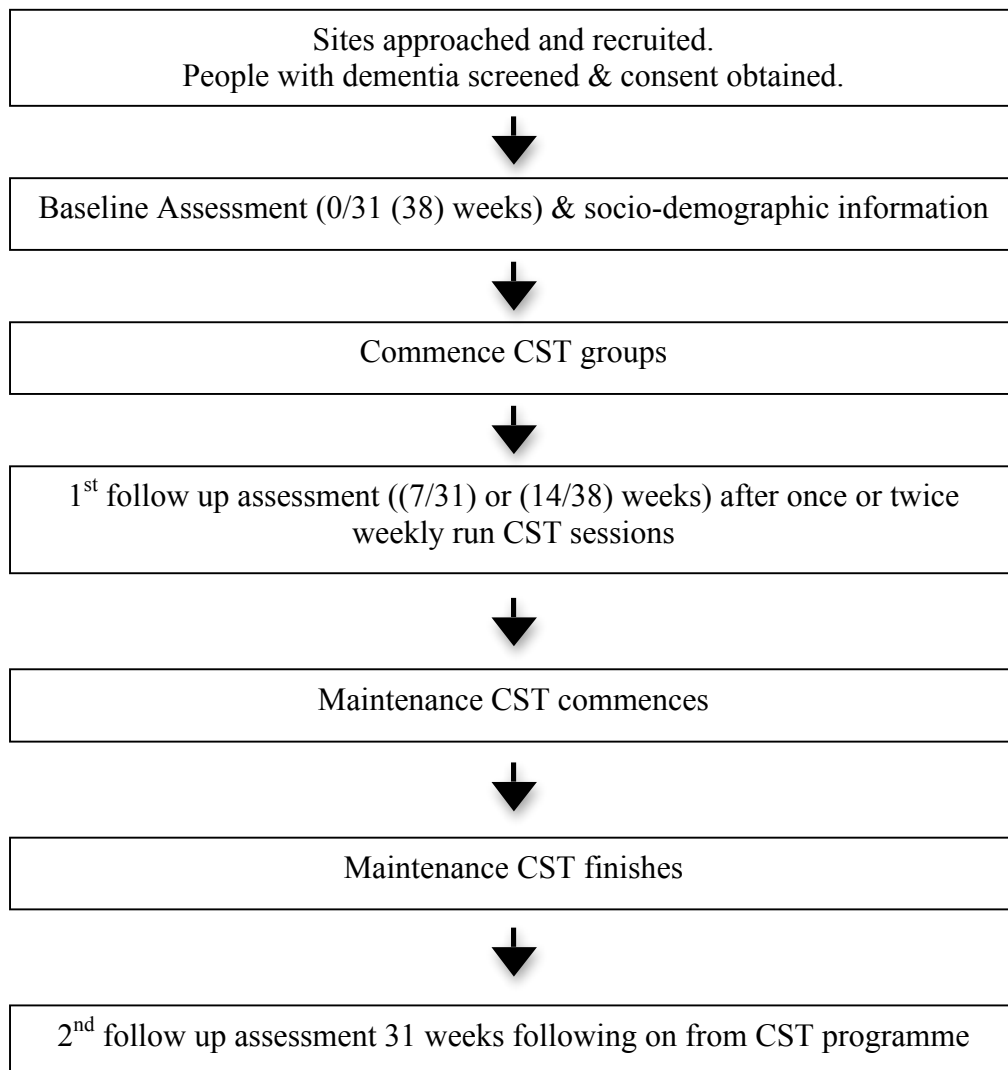

Supplement: MOESM4 [file 9619694]
